# Supplementary material for: Sustainable design of non-fluorinated yet oleophobic fibrous surfaces
Source: Royal Society of Chemistry journal article supplement (doi:10.1039/d4ta01659a), 2024-01-01
Supplement: d4ta01659a1.pdf [file d4ta01659a1.pdf]

## Supplementary Information for

### Sustainable Design of Non-Fluorinated yet Oleophobic Fibrous Surfaces

Sadaf Shabanian<sup>1,2</sup>, Xiaoxiao Zhao<sup>1</sup>, Samuel Au<sup>1</sup>, Nicole Furtak<sup>1</sup>, Kevin Golovin<sup>1,3</sup>

<sup>1</sup>Department of Mechanical & Industrial Engineering, University of Toronto, Toronto, ON, M5S 3G8, Canada

<sup>2</sup>School of Engineering, University of British Columbia, Kelowna, BC, V1V 1V7, Canada

<sup>3</sup>Department of Materials Science & Engineering, University of Toronto, Toronto, ON, M5S 3G8, Canada

**Table S1.** The XPS results of the surface elemental composition of PDMS brush-coated stainless-steel mesh and the atomic ratios of SiO<sub>2</sub>(CH<sub>3</sub>)<sub>2</sub>/ SiO<sub>2</sub> and C/Si.

| SiO <sub>2</sub> (%) | SiO <sub>2</sub> (CH <sub>3</sub> ) <sub>2</sub> (%) | O (%) | C (%) | Cr (%) | SiO <sub>2</sub> (CH <sub>3</sub> ) <sub>2</sub> / SiO <sub>2</sub> | C/Si |
|----------------------|------------------------------------------------------|-------|-------|--------|---------------------------------------------------------------------|------|
| 1.87                 | 21.43                                                | 25.71 | 47.38 | 3.61   | 11.5                                                                | 2.3  |

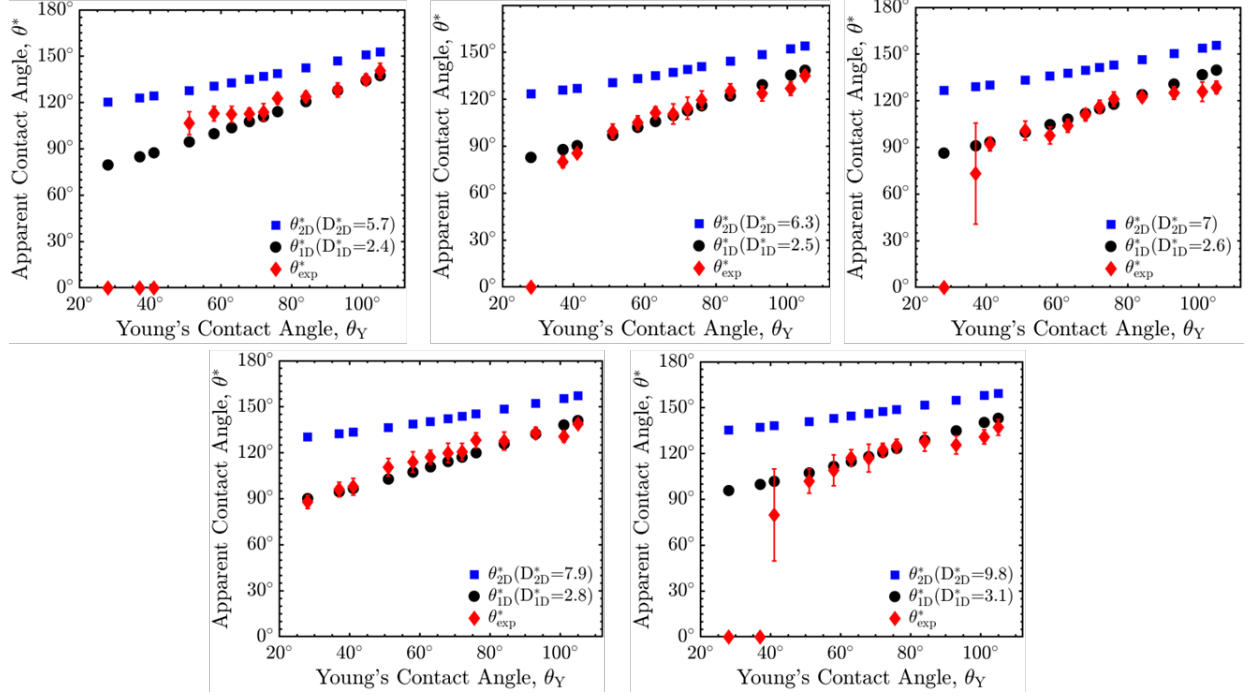

**Figure S1.** Experimental apparent contact angle,  $\theta^*$ , of droplets of ethanol-water mixtures on the monofilament twill weave fabrics with  $D_{1D}^*$  values ranging from 2.4 – 3.1, in comparison with the calculated values of  $\theta_{1D}^*$  and  $\theta_{2D}^*$  from Eq. 1 in the main manuscript.

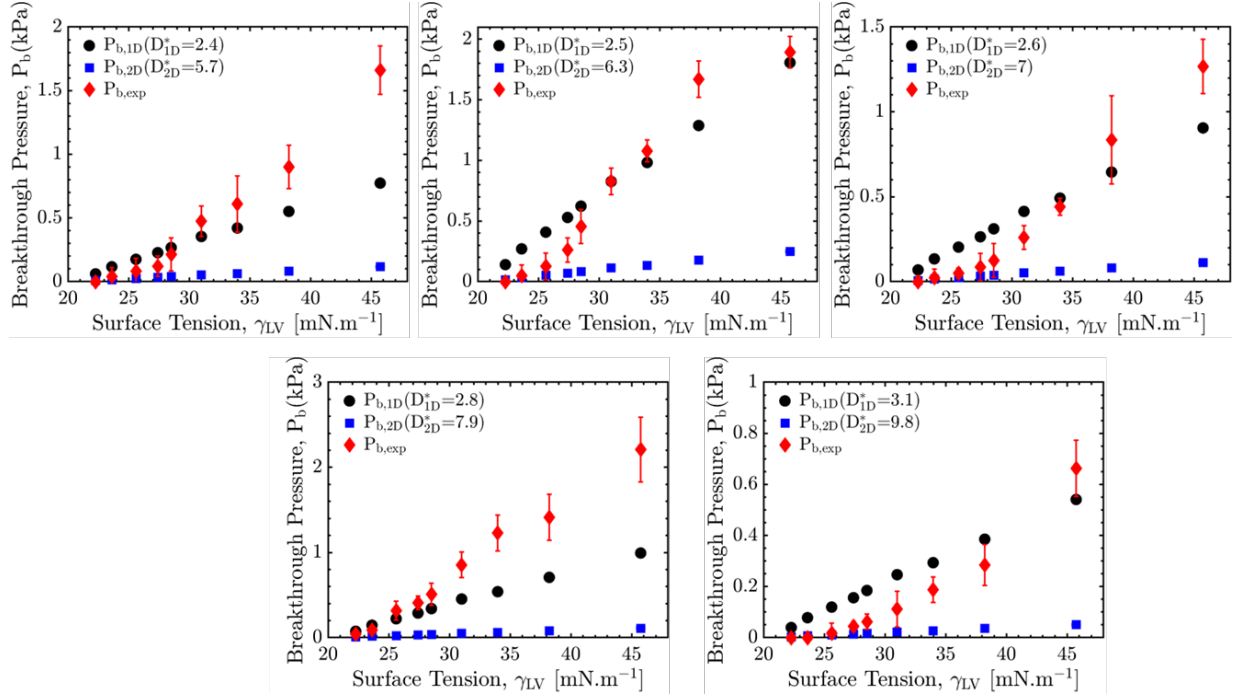

**Figure S2.** The breakthrough pressure of a column of ethanol-water mixtures with surface tensions ranging from 45.7 to 22.3 mN.m<sup>-1</sup> on the monofilament twill weave fabrics with  $D_{1D}^*$  values ranging from 2.4 – 3.1.

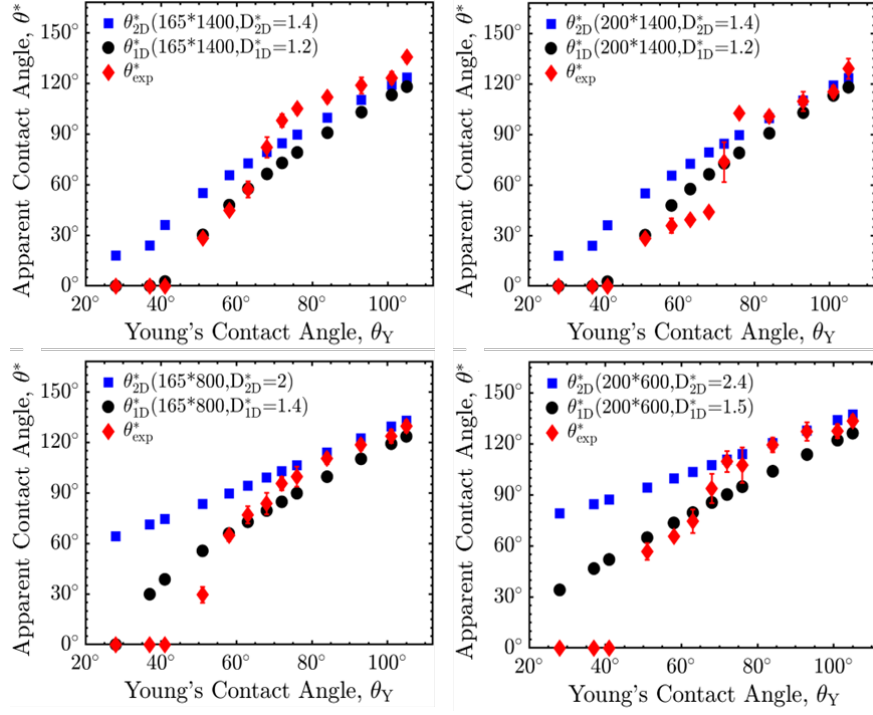

**Figure S3.** Experimental apparent contact angles,  $\theta^*$ , of droplets of ethanol-water mixtures on the monofilament Dutch weave fabrics with  $D_{1D}^*$  ranging from 1.2 – 1.5, in comparison with the calculated values of  $\theta_{1D}^*$  and  $\theta_{2D}^*$  from Eq. 1 in the main manuscript.

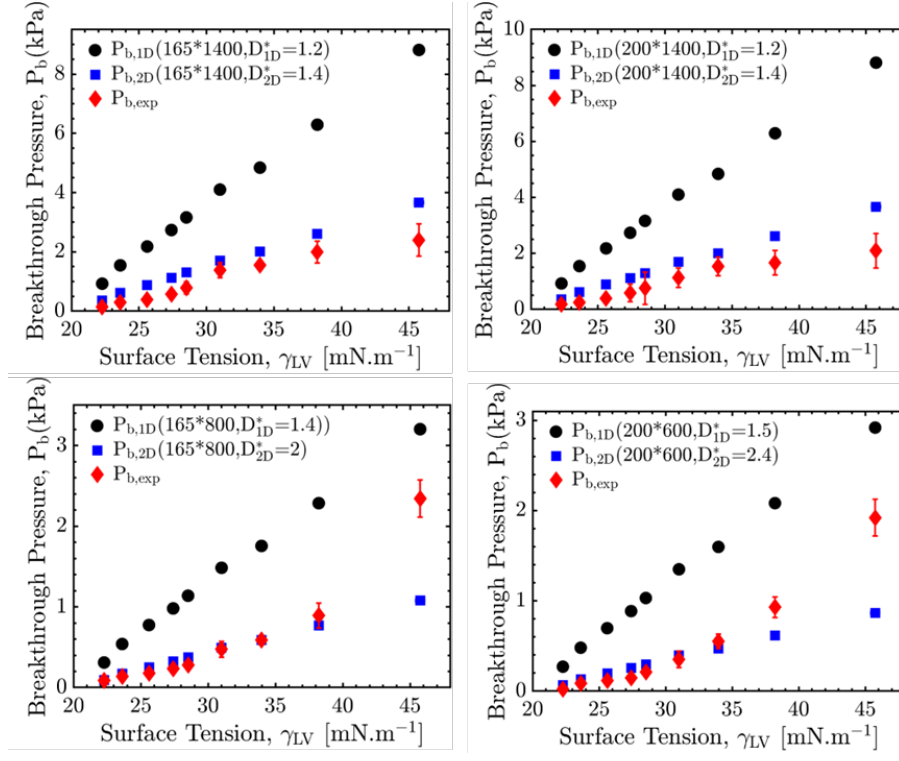

**Figure S4.** The breakthrough pressure of a column of ethanol-water mixtures with surface tensions ranging from 45.7 to 22.3 mN.m<sup>-1</sup> on the monofilament Dutch-weave fabrics with  $D_{1D}^*$  values ranging from 1.2 – 1.5.
